# Supplementary material
Source: PubMed Central journal article supplement (PMC9617796)
Supplement: NIHMS1834595-supplement-1.pdf [file NIHMS1834595-supplement-1.pdf]

**Table S1. Primers used for quantitative real-time PCR. (Related to Figure 2 and Figure S5)**

| Name          | Forward primer (5'→3') | Reverse primer (5'→3') |
|---------------|------------------------|------------------------|
| <i>Trpv1</i>  | AGCTGCAGCGAGCCATCACCA  | ATCCTTGCCGTCCGGCGTGA   |
| <i>Tac1</i>   | GGTCTGACCGCAAATCGAAC   | GATCTGGTCACTGTCGGACC   |
| <i>Scn10a</i> | CCTGCTGCAAAGTGAACACC   | CAGACTTCACTCGGGGCTTT   |
| <i>Actb</i>   | TGTTACCAACTGGGACGACA   | TCTCAGCTGTGGTGGTGAAG   |

**Table S2. Phylum-specific qPCR primers. (Related to Figure 3)**

| Name                 | Forward primer (5'→3')    | Reverse primer (5'→3') |
|----------------------|---------------------------|------------------------|
| <i>Bacteroidetes</i> | GGTAGTCCACACAGTAAACGATGAA | CCCGTCAATTCCTTTGAGTTTC |
| <i>Firmicutes</i>    | GGAGYATGTGGTTTAATTCGAAGCA | AGCTGACGACAACCATGCAC   |
| <i>Universal 16S</i> | ACTCCTACGGGAGGCAGCAGT     | ATTACCGCGGCTGCTGGC     |

**Table S3. Baseline characteristics of the healthy individual donors or patients with IBD. (Related to Figure 7)**

| <b>Characteristics</b>                      | <b>No.</b>             | <b>%</b>             |
|---------------------------------------------|------------------------|----------------------|
| <b>Gender</b><br>Female/Male                | 2/6                    | 25/75                |
| <b>Age</b><br>Mean (years) +/- SEM<br>Range | 12.5 +/- 1.524<br>7-16 |                      |
| <b>Pathology</b><br>Healthy<br>IBD          | 4<br>4                 | 50<br>50             |
| <b>Mayo Score</b><br>5<br>1<br>2<br>6       | 1<br>1<br>1<br>1       | 25<br>25<br>25<br>25 |

All parameters were evaluated among 4 healthy and 4 IBD patients enrolled in the prospective study.
