# Supplementary material
Source: PubMed Central journal article supplement (PMC9617796)
Supplement: NIHMS1834595-supplement-8.pdf [file NIHMS1834595-supplement-8.pdf]

Figure S7

A. Homeostatic balance of microbiota-nociceptor-immune system

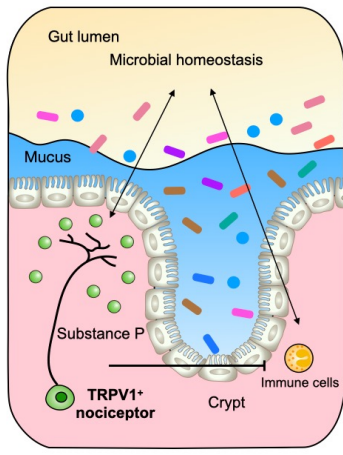

B. Disruption of nociceptor function results in dysbiosis and exacerbated intestinal damage and inflammation

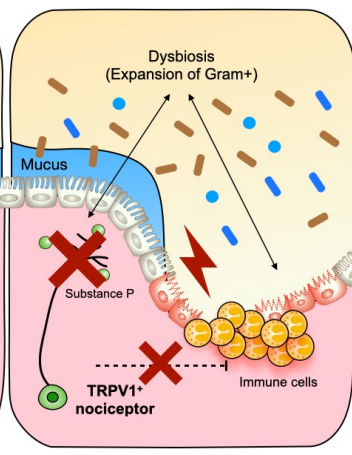

C. Gram+ Clostridium spp. are sufficient to drive intestinal damage and inflammation in nociceptor-disrupted mice

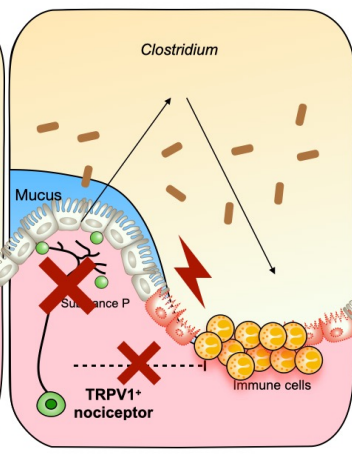

D. Gram+ Clostridium spp. are sufficient to promote intestinal tissue protection in nociceptor-sufficient mice

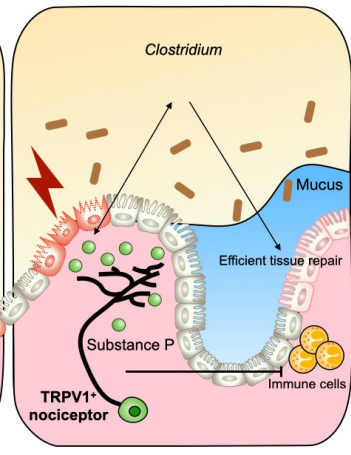

|                                |             |                     |                                         |                                         |
|--------------------------------|-------------|---------------------|-----------------------------------------|-----------------------------------------|
| Nociceptor function            | Normal      | Disrupted           | Disrupted                               | Normal                                  |
| Microbiota status              | Normal      | Dysbiosis           | <i>Clostridium</i> spp.- mono-colonized | <i>Clostridium</i> spp.- mono-colonized |
| Inflammation/tissue protection | Homeostasis | Severe inflammation | Severe inflammation                     | Tissue protection                       |
