# Supplementary material
Source: PubMed Central journal article supplement (PMC9617796)

**Figure S1**

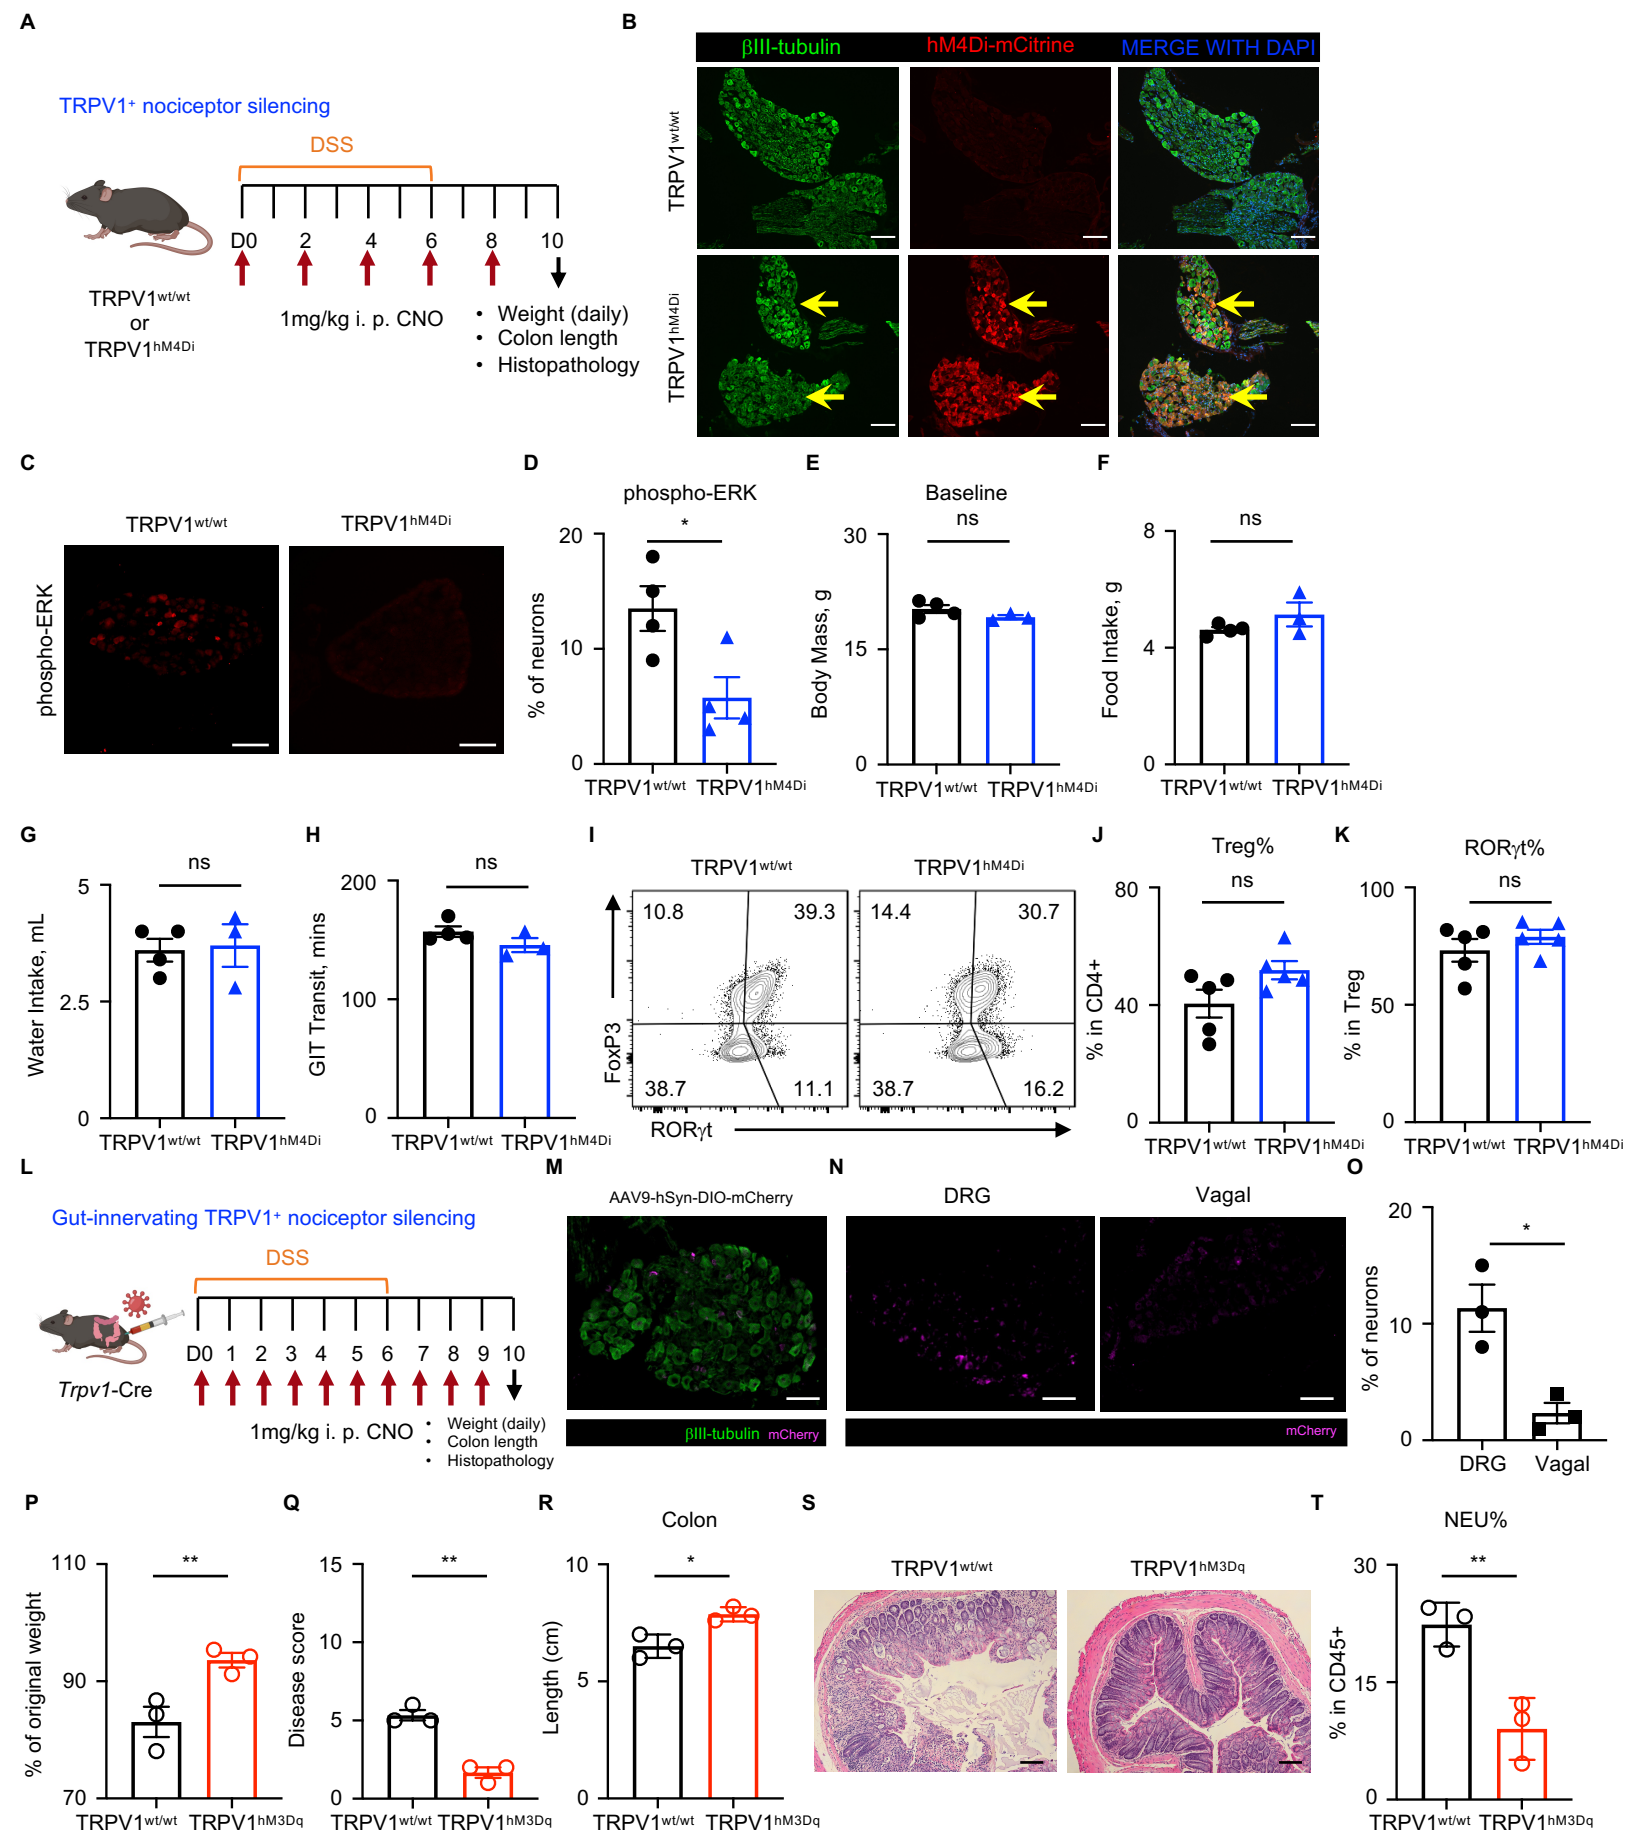

Supplement: NIHMS1834595-supplement-2.pdf [file NIHMS1834595-supplement-2.pdf]

**Figure S2**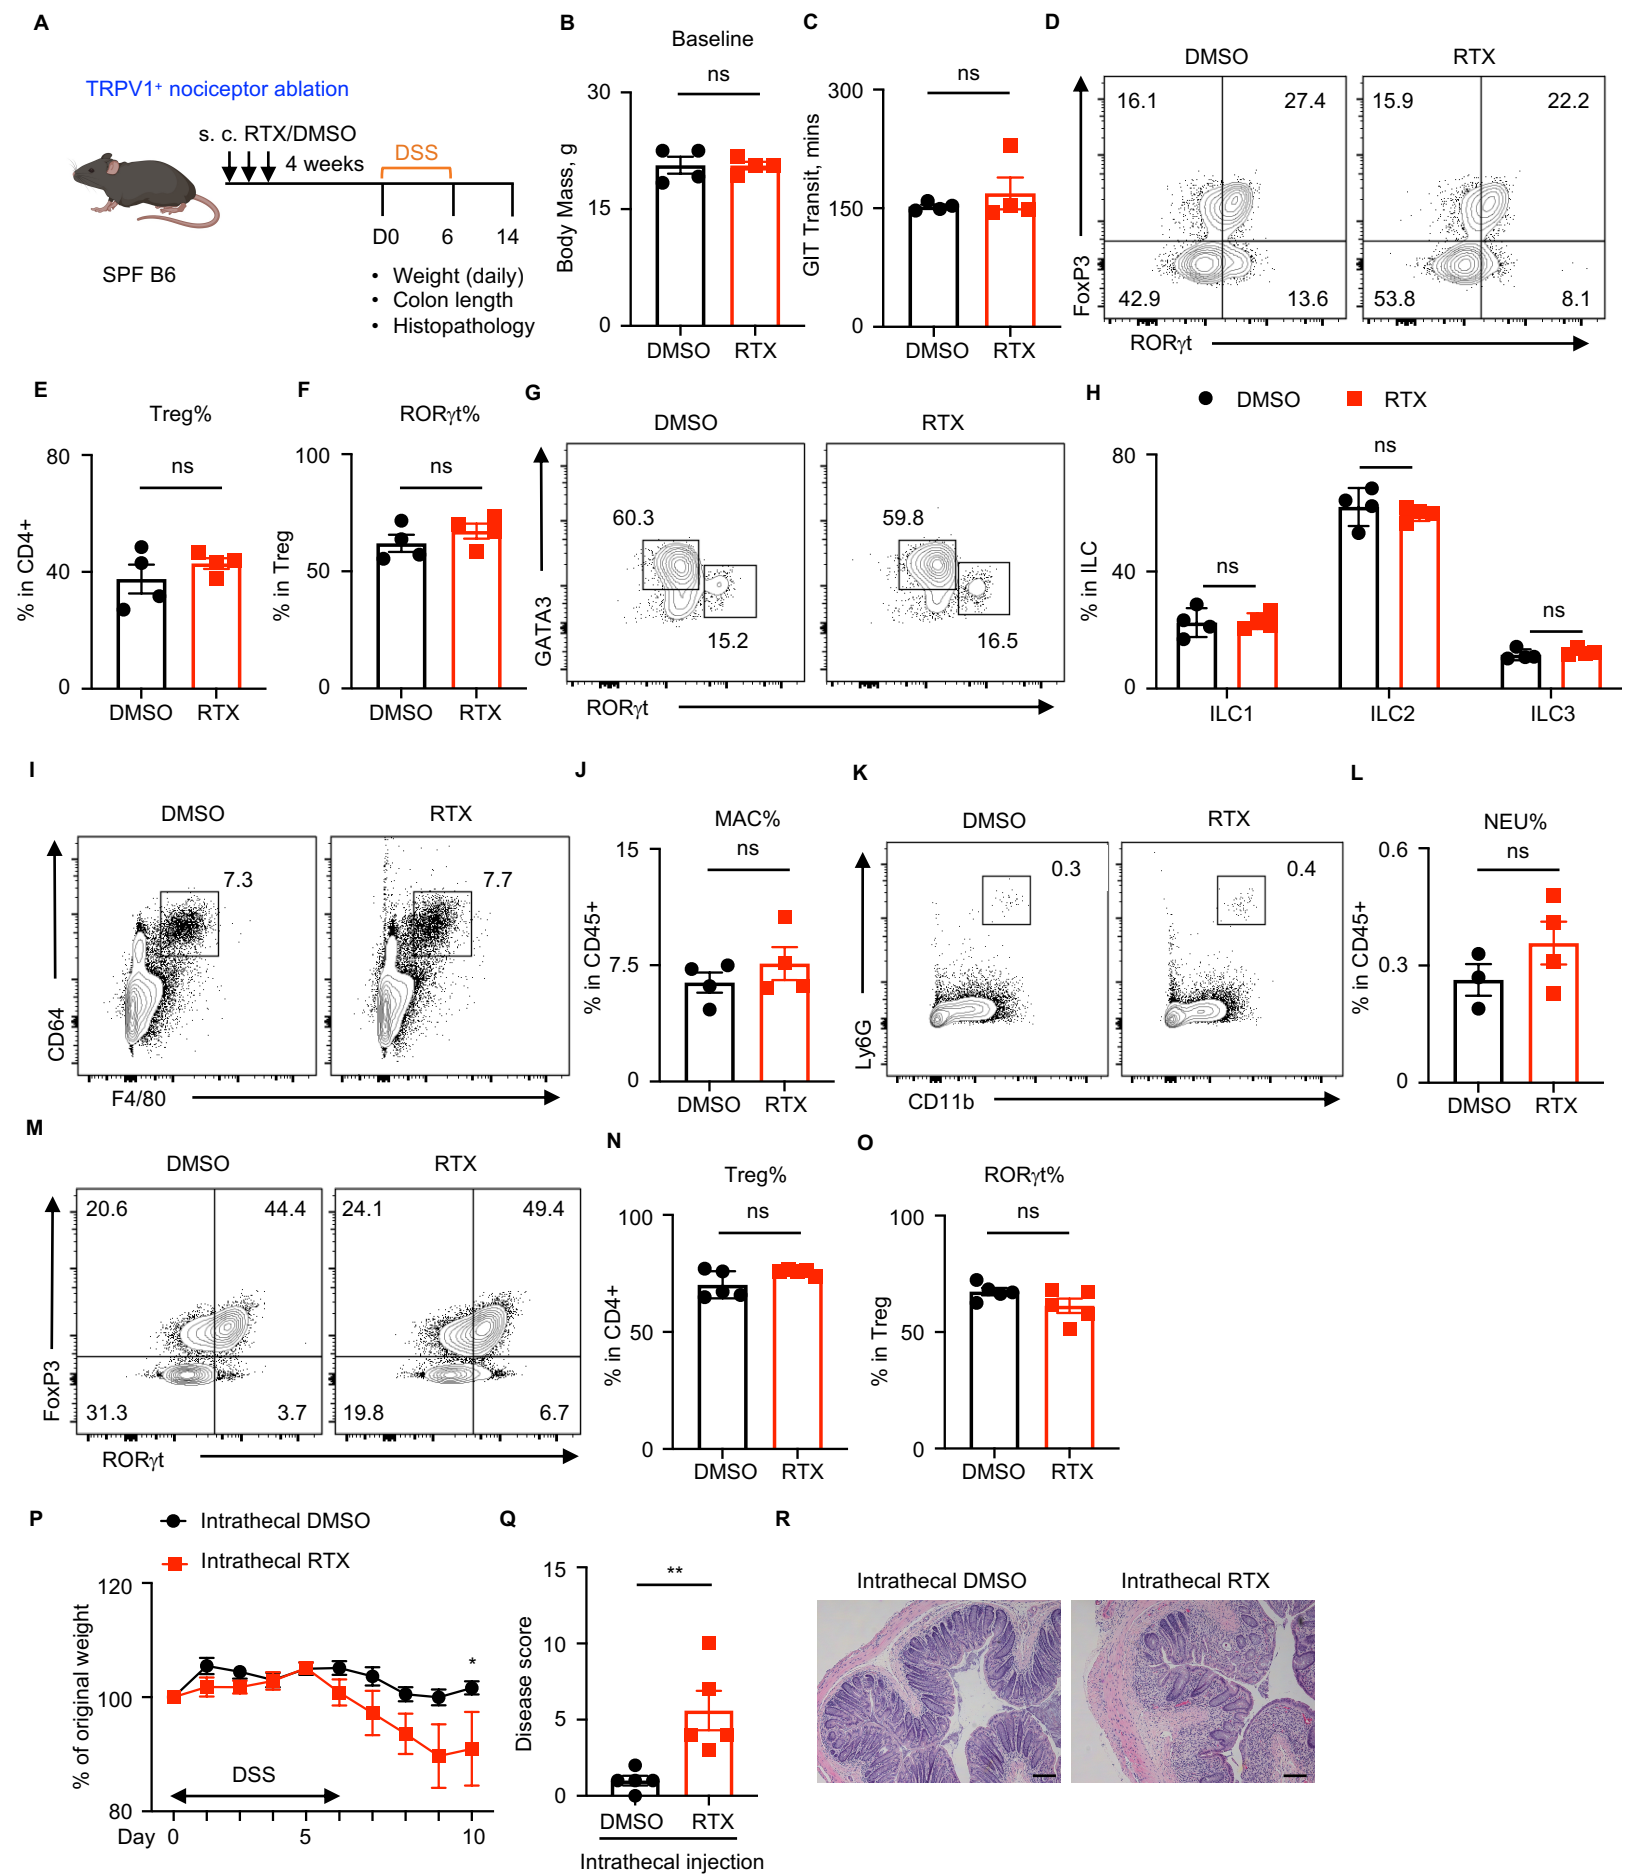

Supplement: NIHMS1834595-supplement-3.pdf [file NIHMS1834595-supplement-3.pdf]

**Figure S3**

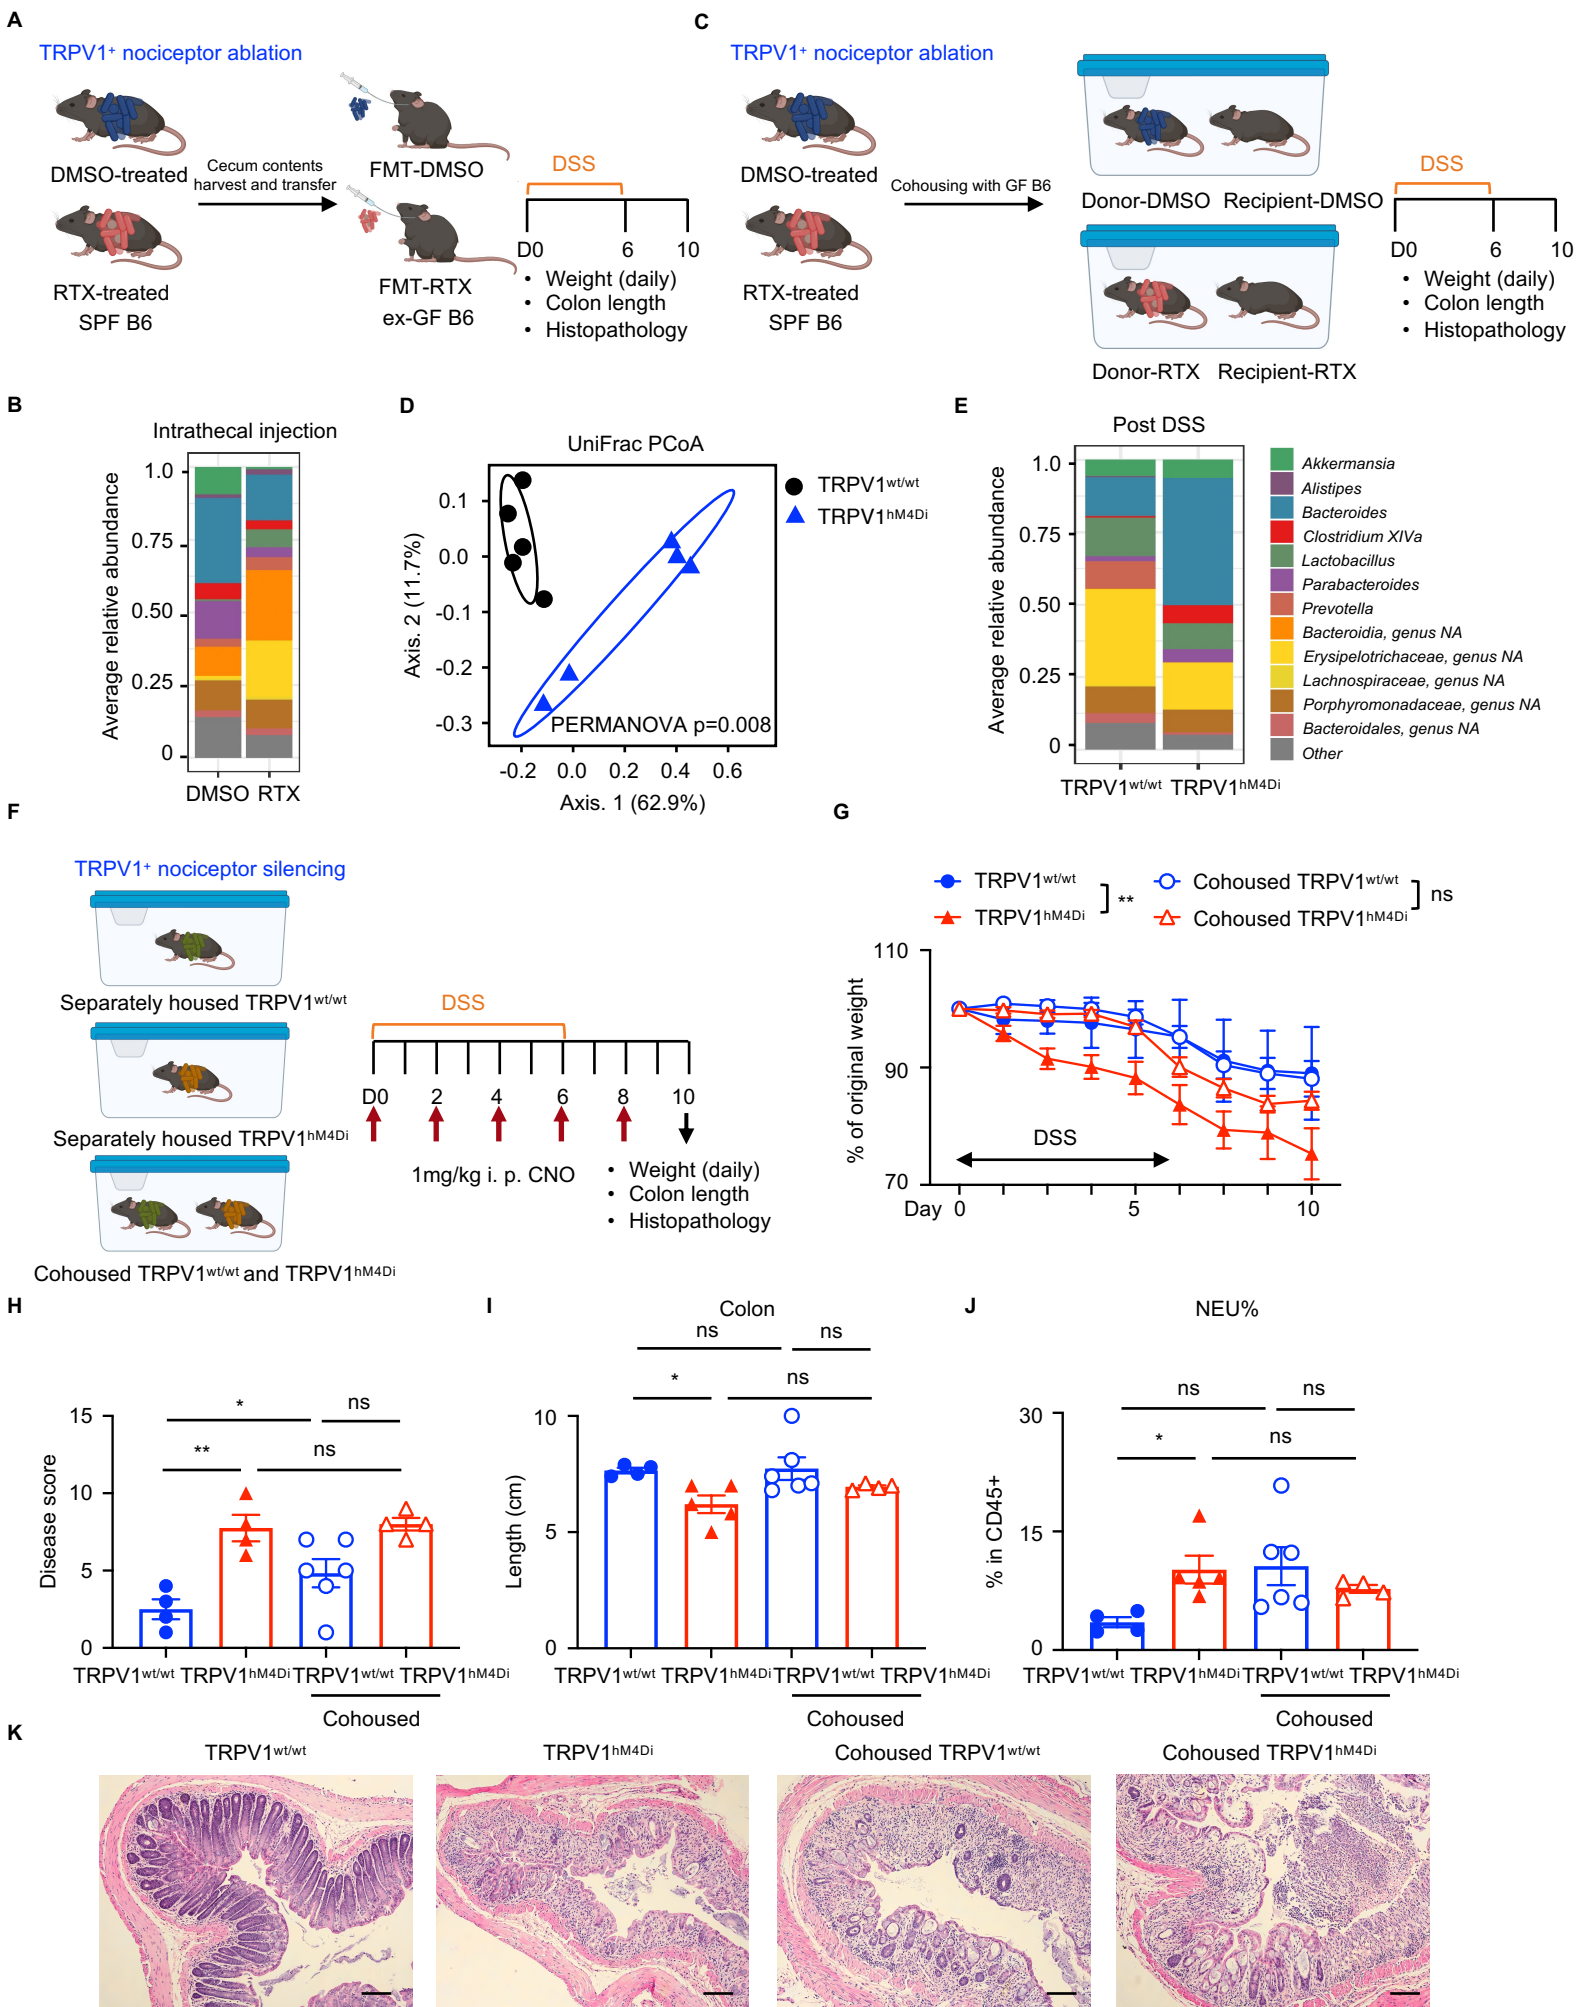

Supplement: NIHMS1834595-supplement-4.pdf [file NIHMS1834595-supplement-4.pdf]

**Figure S4**

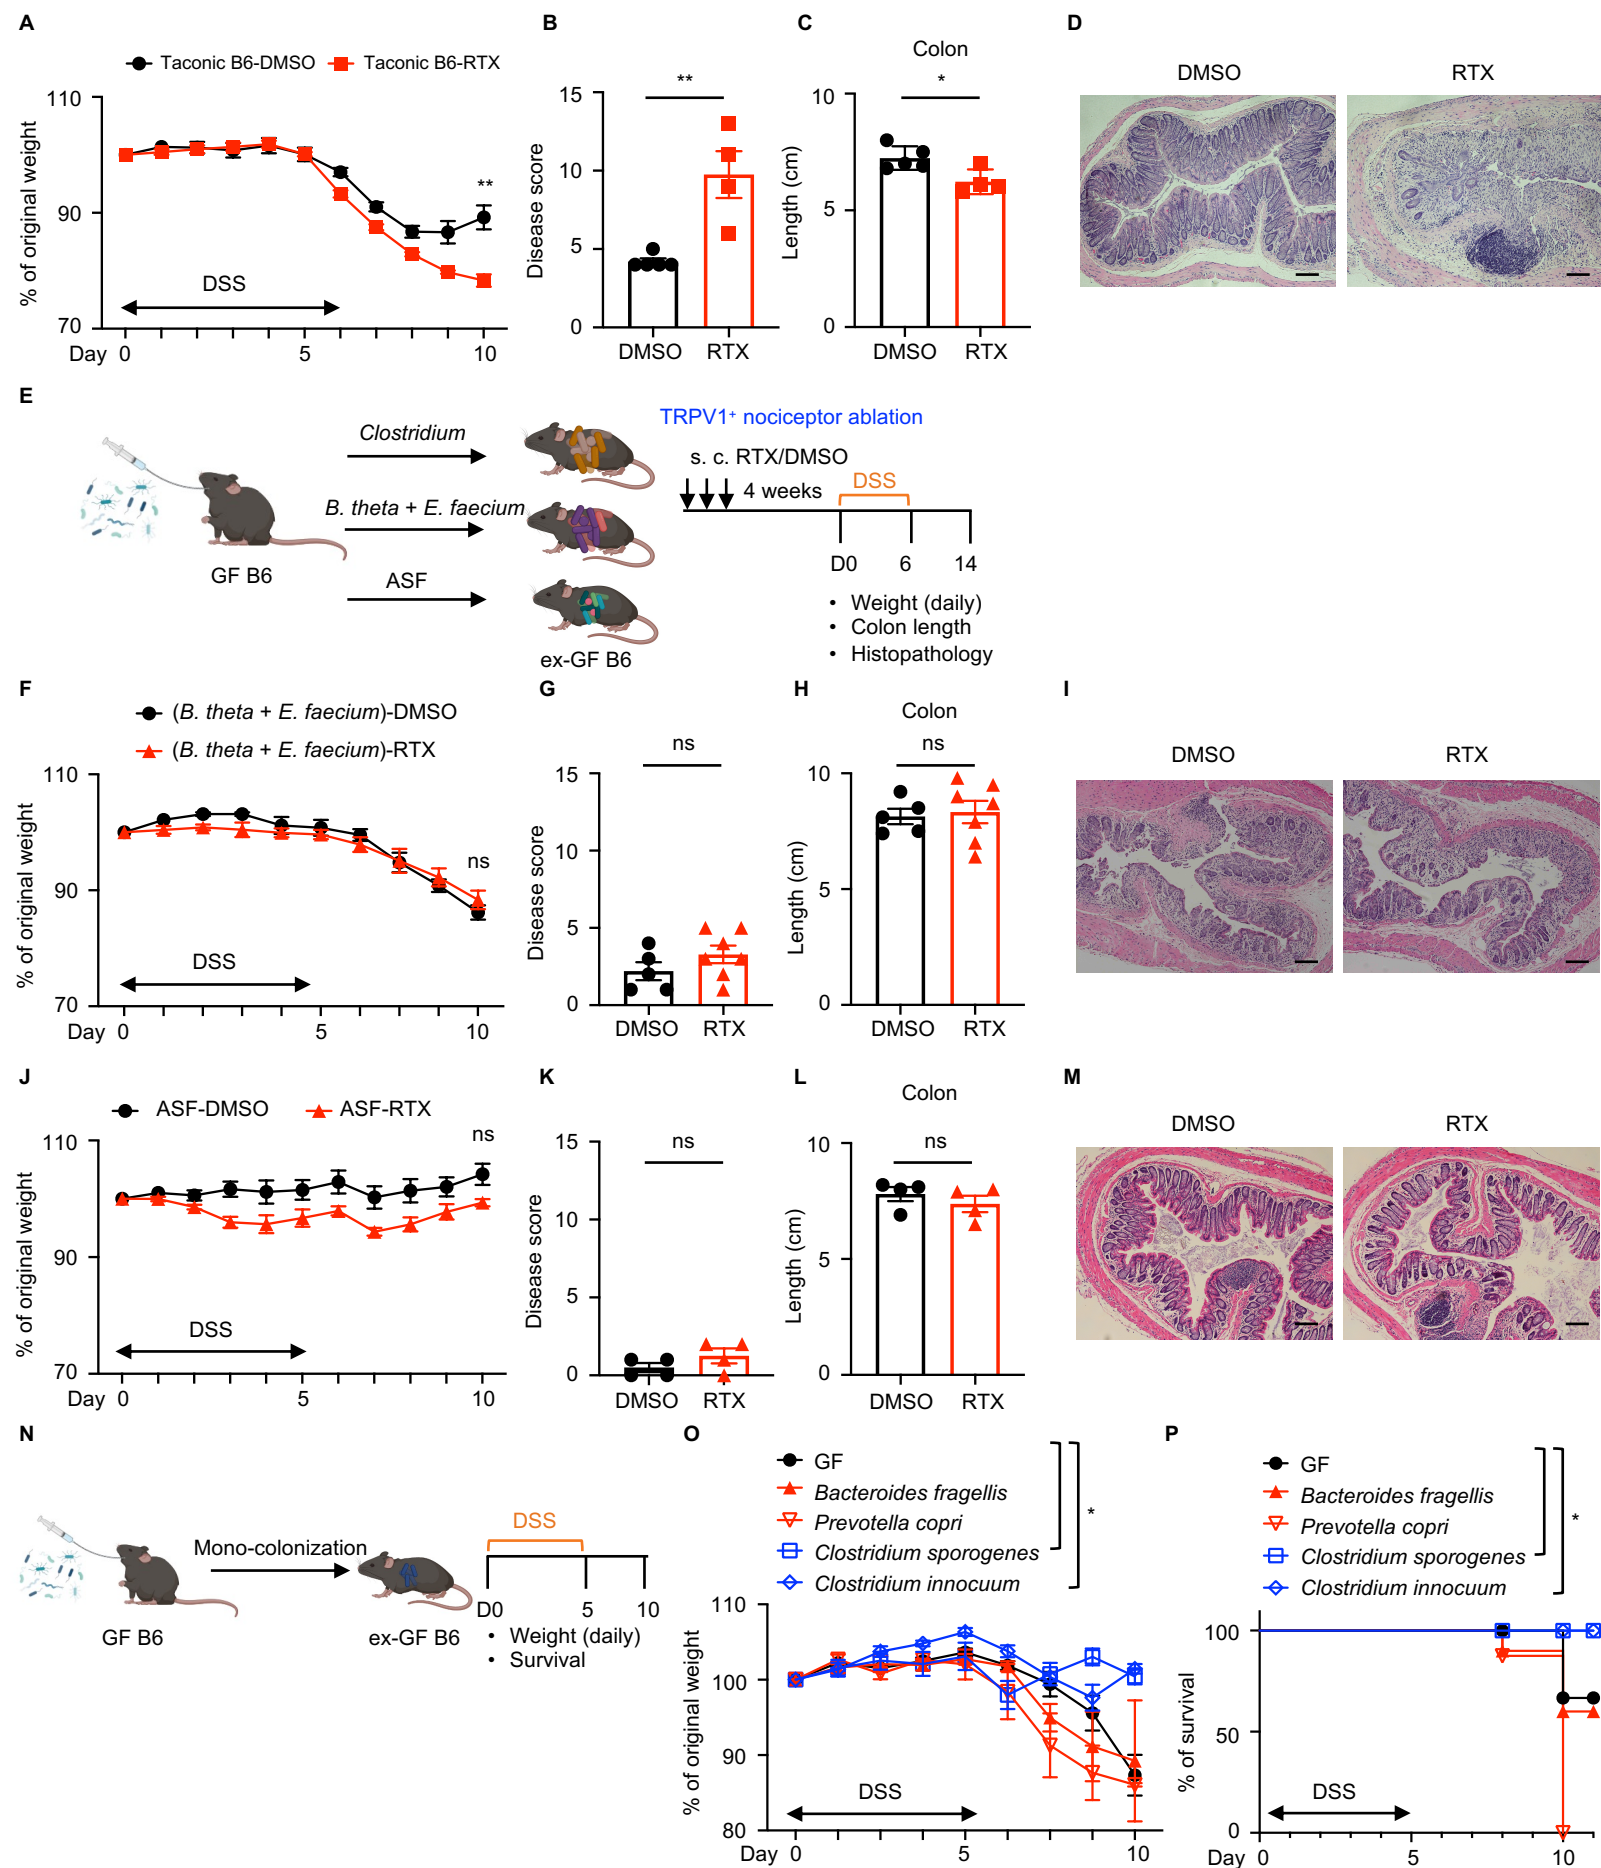

Supplement: NIHMS1834595-supplement-5.pdf [file NIHMS1834595-supplement-5.pdf]

Figure S5

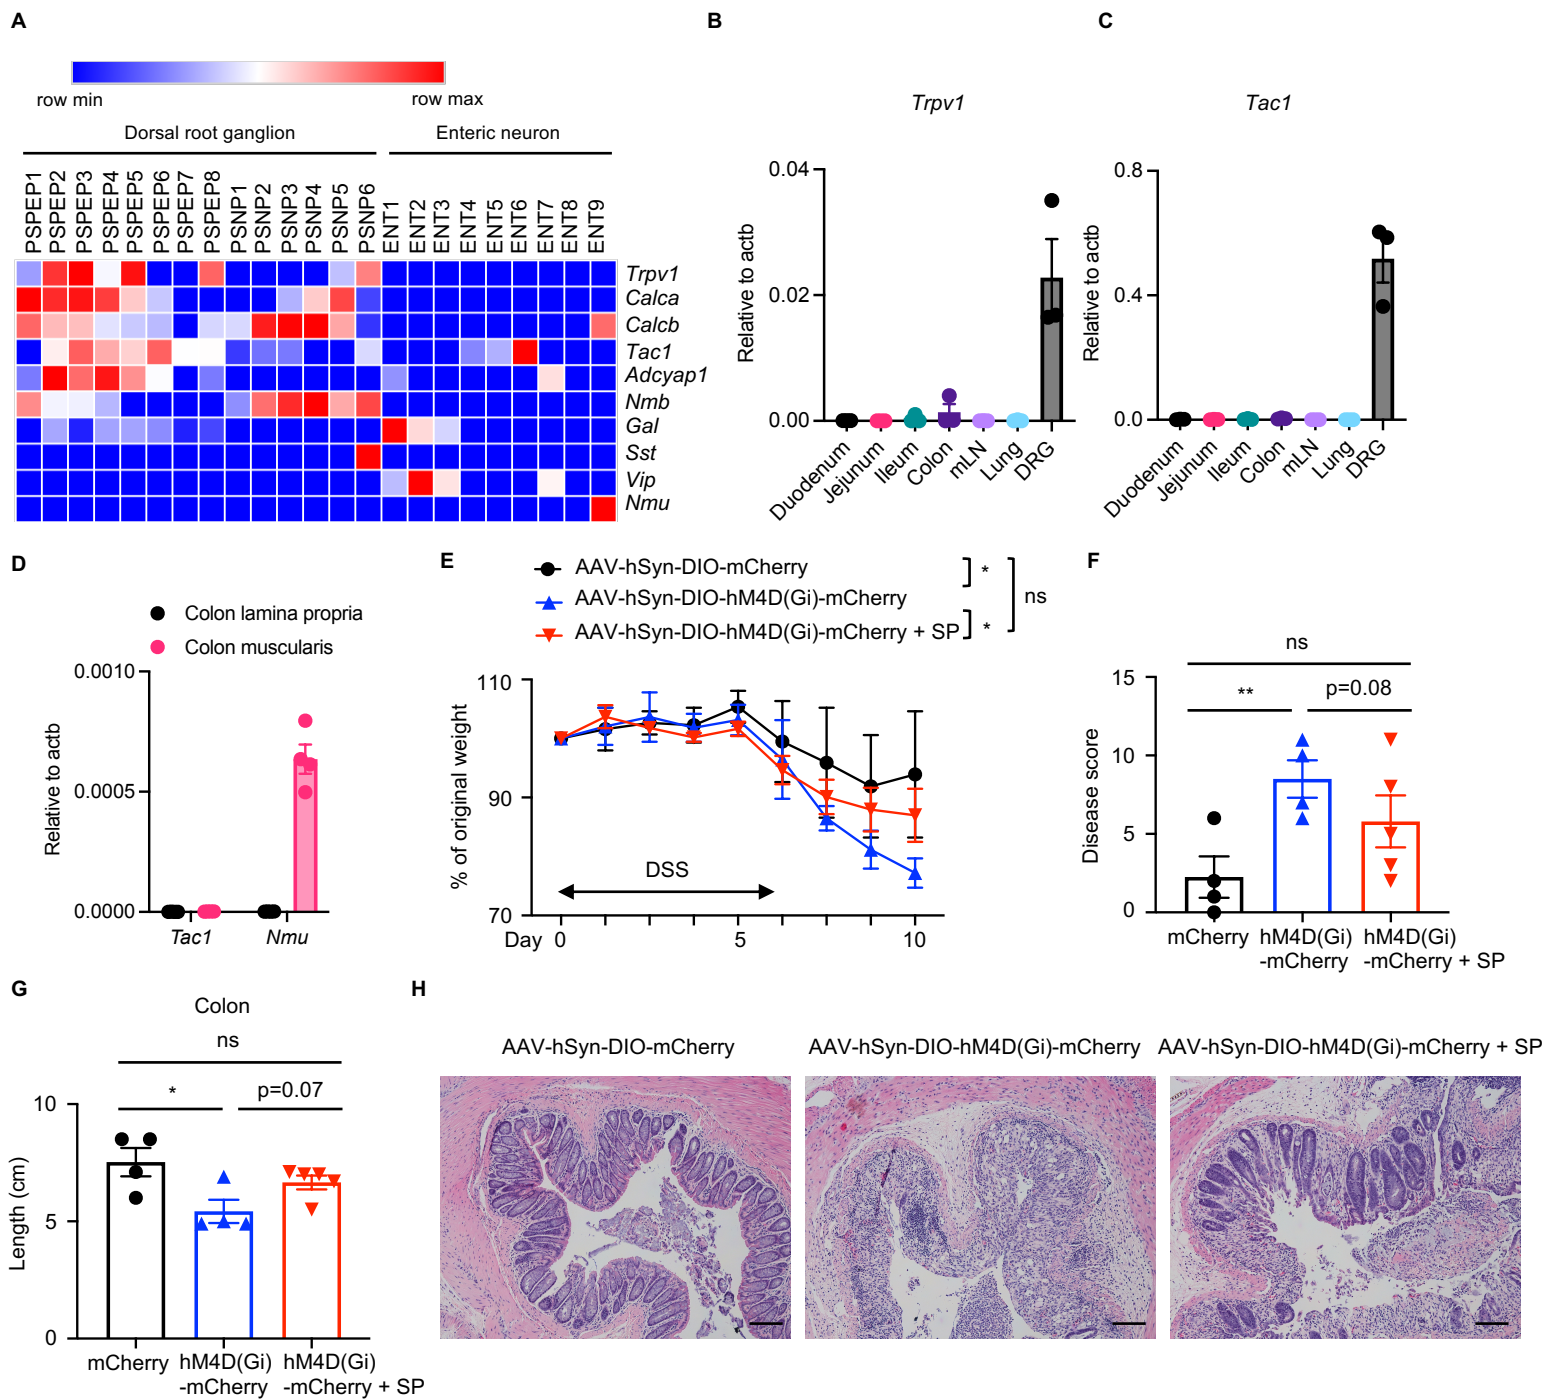

Supplement: NIHMS1834595-supplement-6.pdf [file NIHMS1834595-supplement-6.pdf]

**Figure S6**

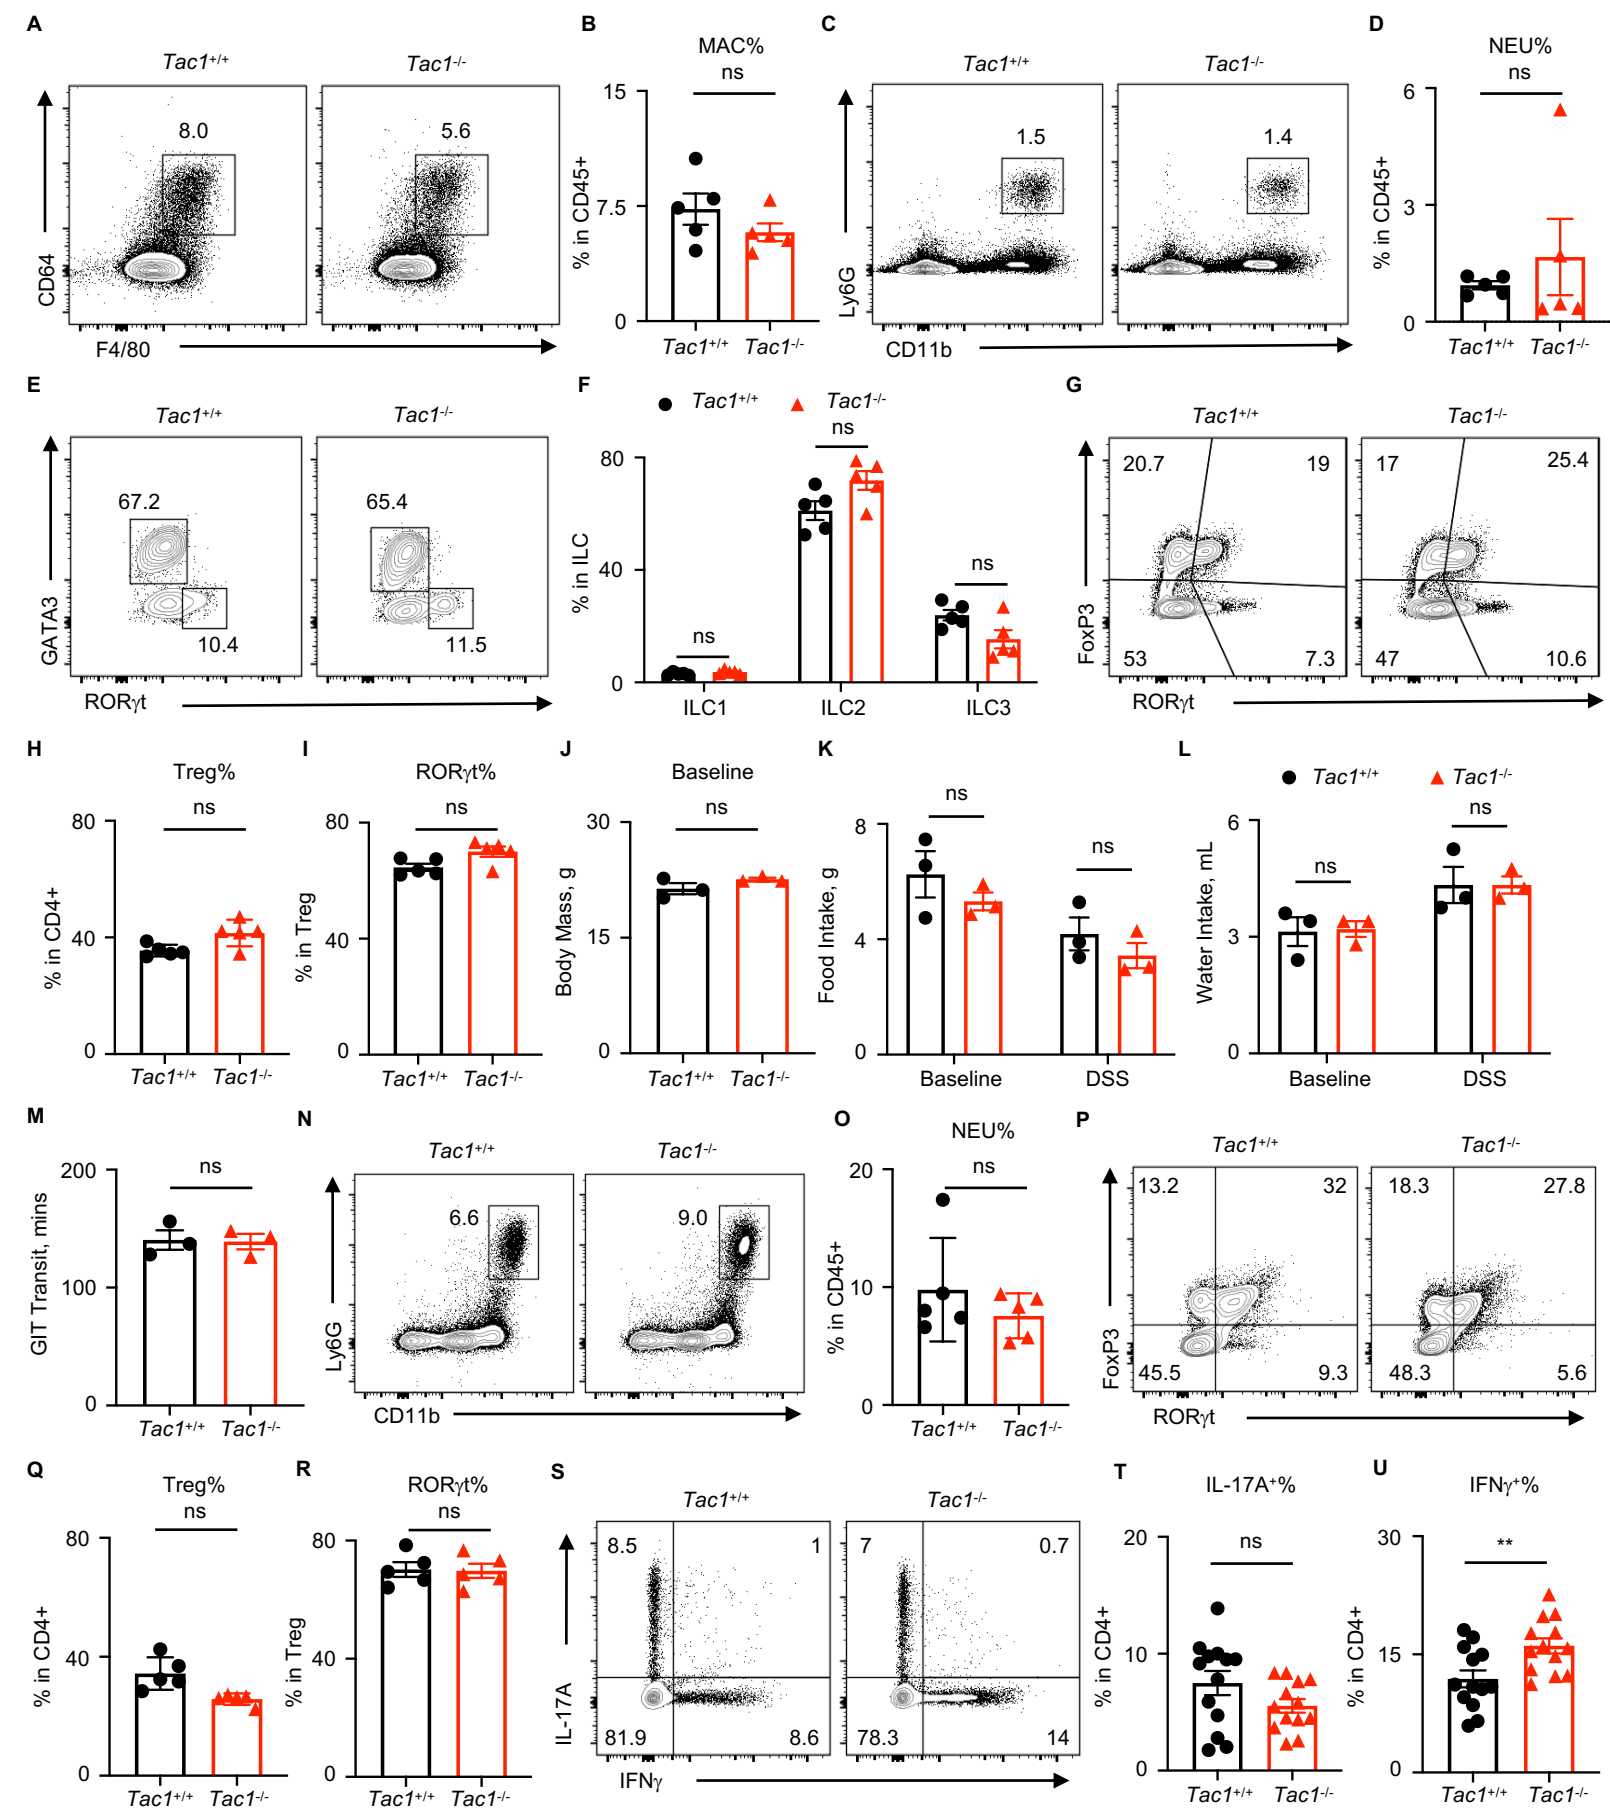

Supplement: NIHMS1834595-supplement-7.pdf [file NIHMS1834595-supplement-7.pdf]
